# Supplementary material for: Nanocapsules formed by interactions between chondroitin sulfate and egg white protein for encapsulating hydrophilic ingredients
Source: Royal Society of Chemistry journal article supplement (doi:10.1039/d1gc01706c), 2021-01-01
Supplement: d1gc01706c1.pdf [file d1gc01706c1.pdf]

## Supporting Information

### **Nanocapsules formed by interactions between chondroitin sulfate and egg white protein for encapsulating hydrophilic ingredients**

Yuxiao Wang<sup>a,b,c</sup>, Haiteng Tao<sup>d</sup>, Kunli Wang<sup>a,c</sup>, Mo Li<sup>a,c</sup>, Xin Wen<sup>a,c</sup>, Rao Fu<sup>a,c</sup>, Chenqiang Qin<sup>a,c</sup>,  
Yuanying Ni<sup>a,c\*</sup>

<sup>a</sup> College of Food Science and Nutritional Engineering, China Agricultural University, Beijing 100083, China

<sup>b</sup> State Key Laboratory of Animal Nutrition, Ministry of Agriculture Feed Industry Centre, Beijing 100083, China

<sup>c</sup> National Engineering Research Center for Fruit and Vegetable Processing, Beijing 100083, China

<sup>d</sup> State Key Laboratory of Biobased Material and Green Papermaking, Qilu University of Technology, Shandong Academy of Sciences, Jinan, 250353, China

---

\*Corresponding author. Tel: +86-010-62737514; Email: niyycou@hotmail.com (Yuanying Ni).

The postal address: College of Food Science and Nutritional Engineering, China Agricultural University, Box 303, No. 17 Tsinghua East Road, Beijing 100083, China.

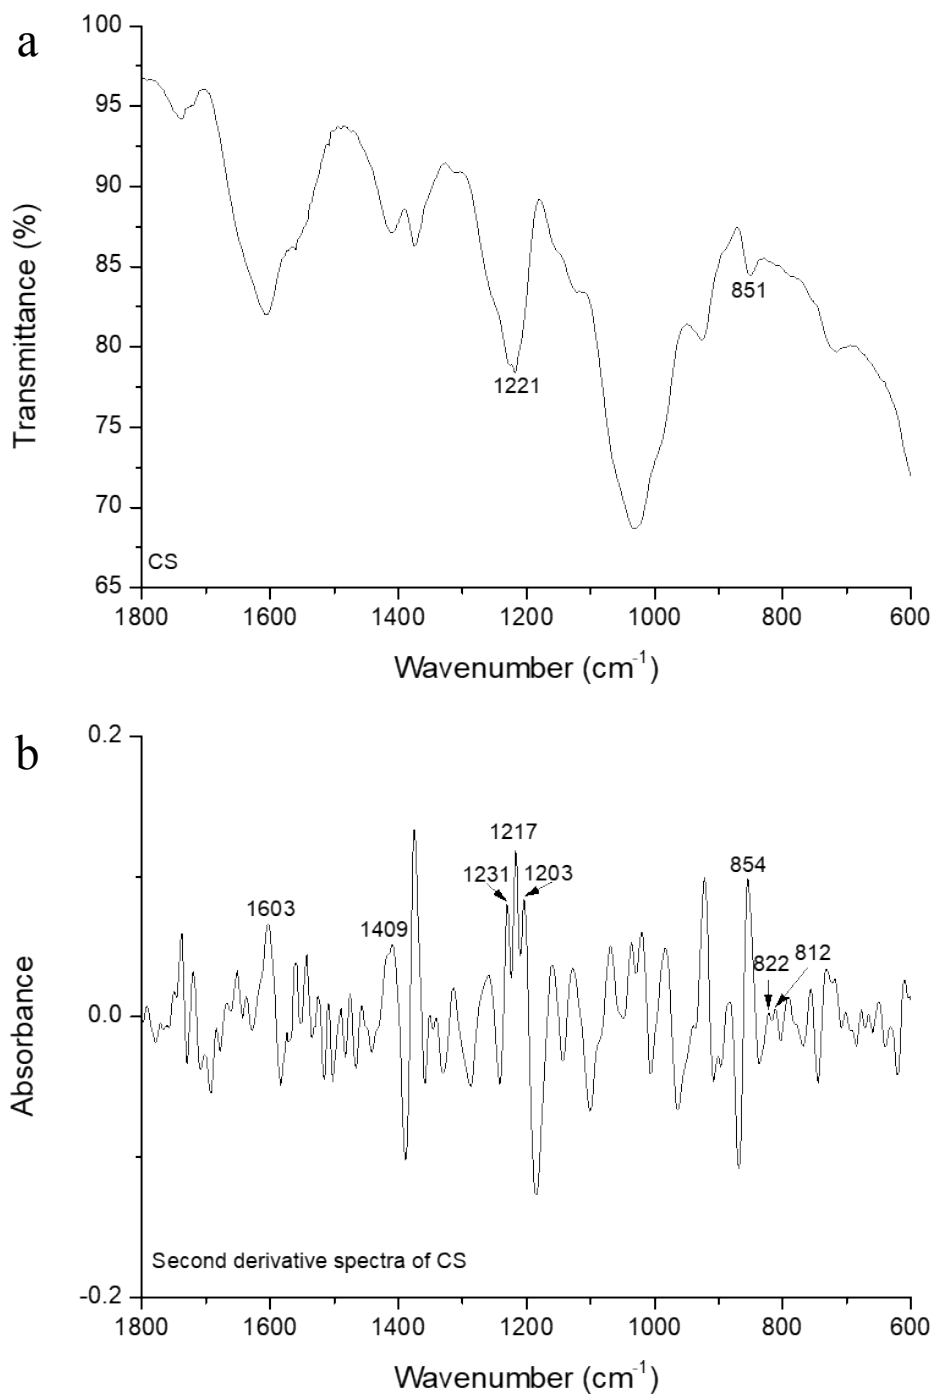

**Figure 1** FTIR spectra of CS (a) and its second derivative spectra (b) from 1800 to 600 cm<sup>-1</sup>.

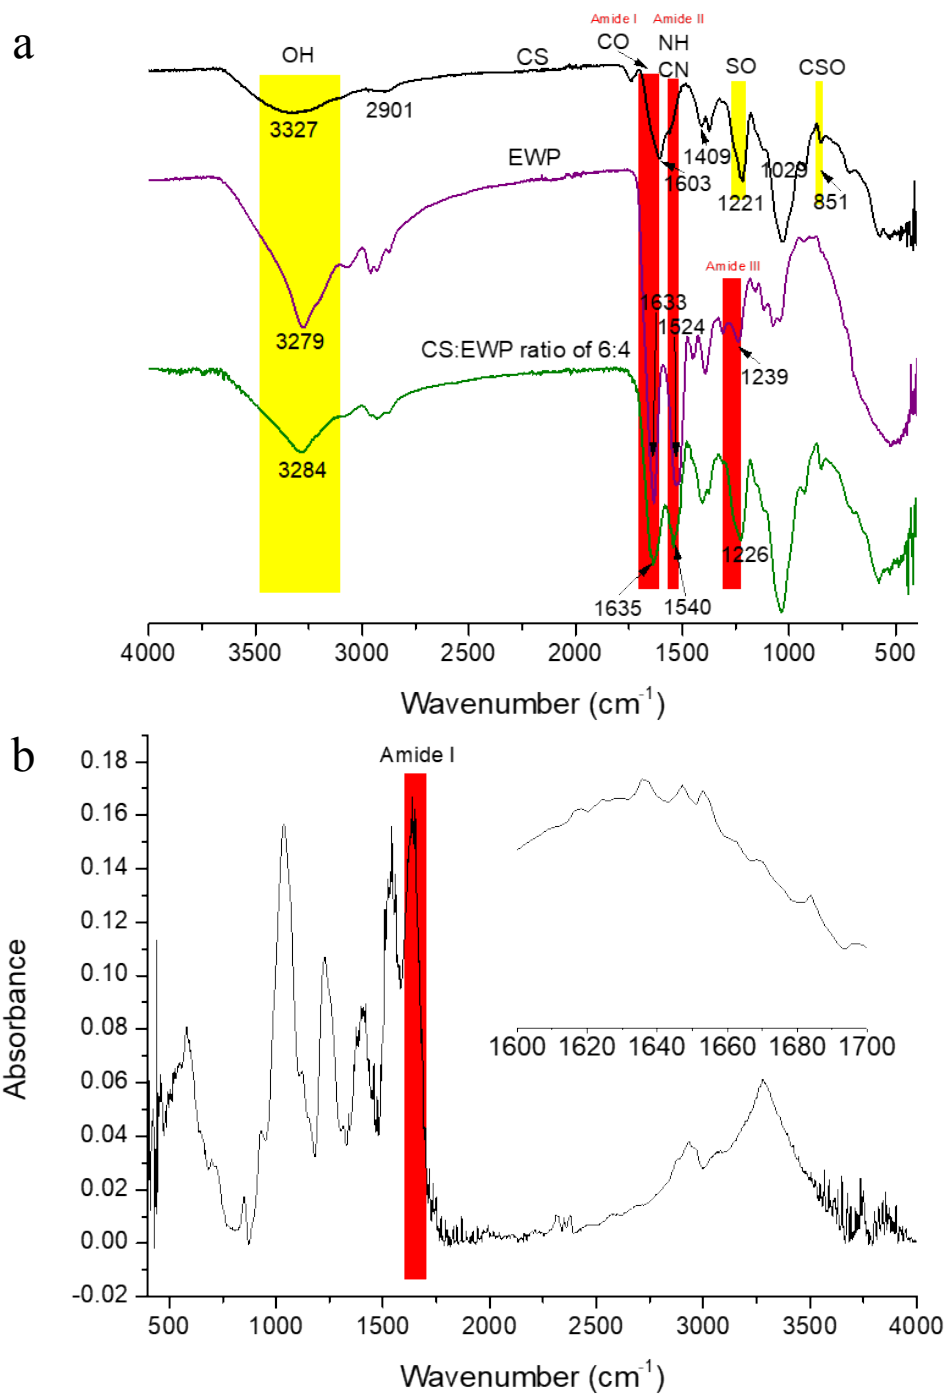

**Figure 2** The FTIR spectra of CS, EWP, nanocapsules synthesized at the CS:EWP ratio of 6:4 (a), and the absorption spectra of nanocapsules synthesized at the CS:EWP ratio of 6:4 (b).

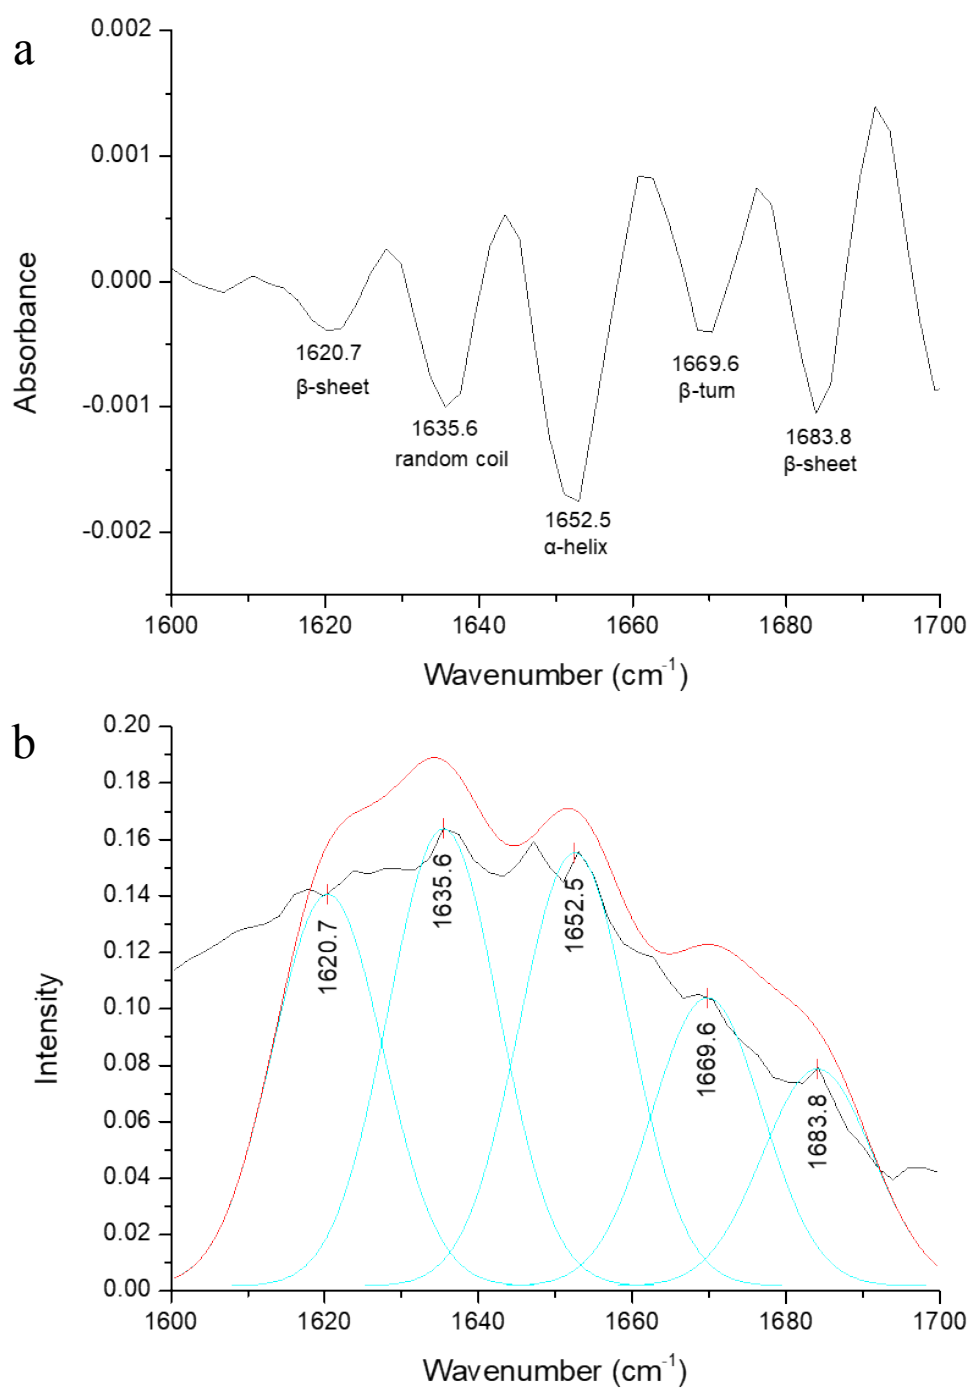

**Figure 3** The secondary structural analysis of EWP by the amide I band (1600-1700 cm<sup>-1</sup>). Results showed the definitions and peak areas of  $\beta$ -sheet, random coil,  $\alpha$ -helix, and  $\beta$ -turn according to (a) the secondary derivative and (b) the deconvolution of EWP.

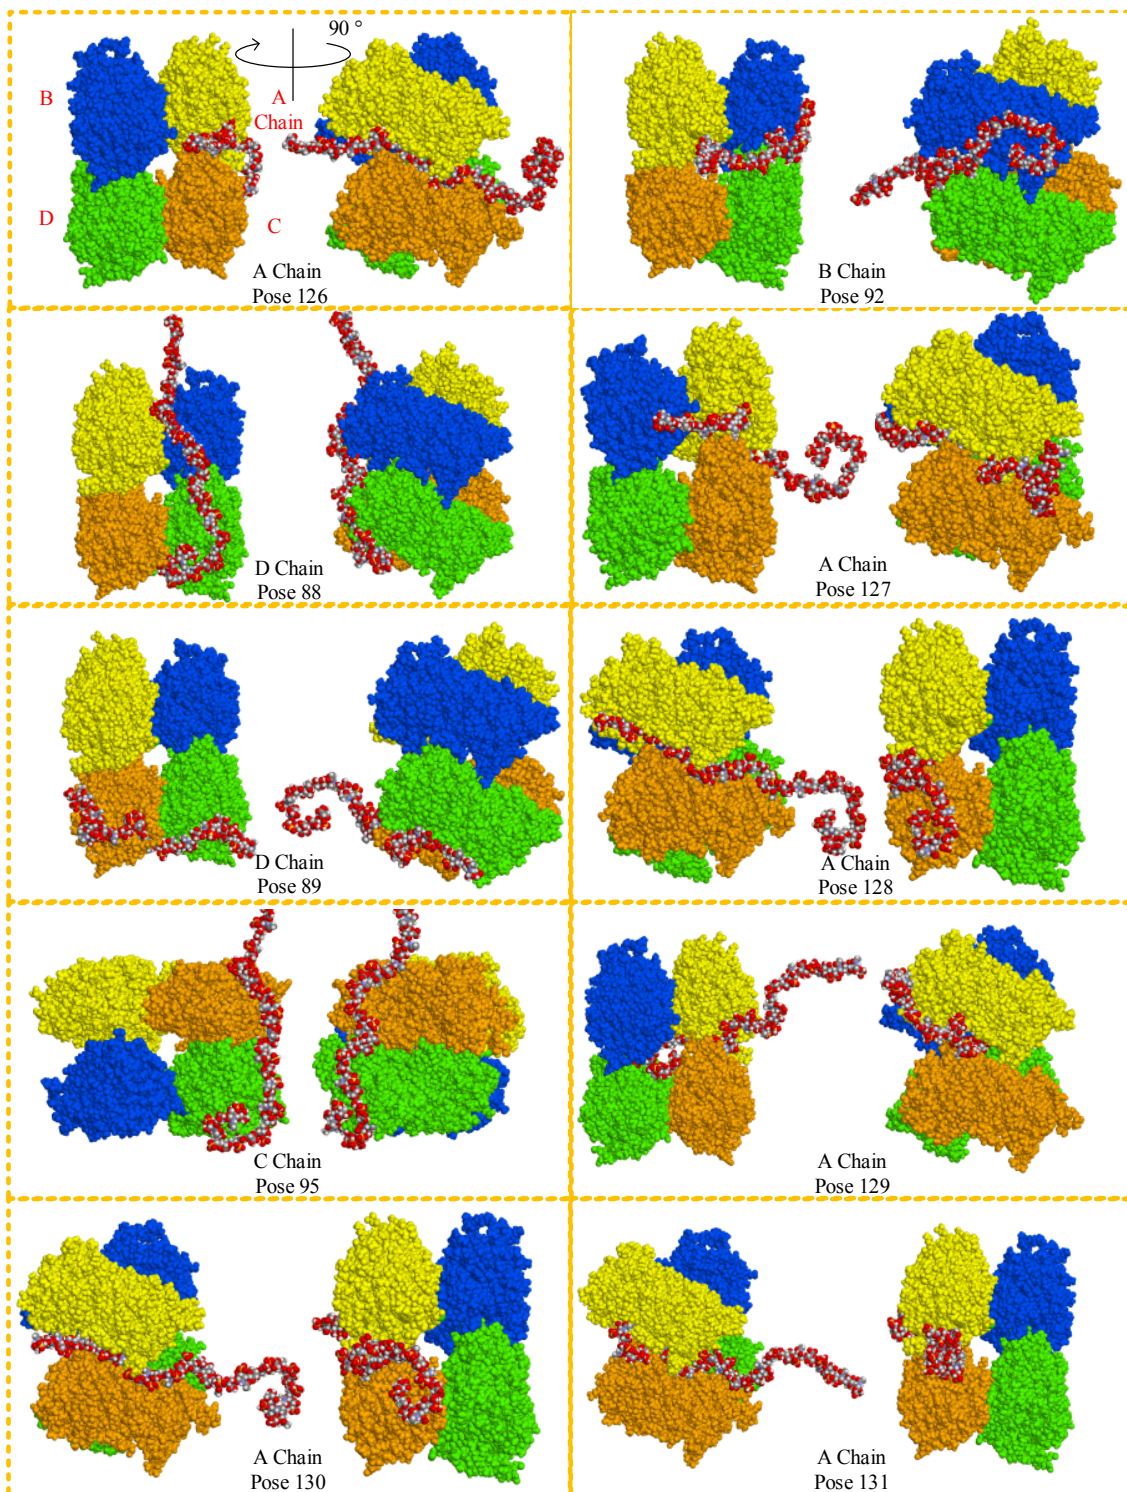

**Figure 4** The best 10 conformations ranked by ZDOCK scores of protein poses in Corey-Pauling-Koltun models. The four chains of EWP were marked as yellow (A Chain), blue (B Chain), orange (C Chain), and green (D Chain), respectively.

**Table 1** The best 10 protein poses ranked by ZDOCK scores in different chains of EWP

| NO. | Chain   | Pose    | ZDOCK Score |
|-----|---------|---------|-------------|
| 1   | A chain | Pose126 | 17.66       |
| 2   | B Chain | Pose92  | 17.6        |
| 3   | D Chain | Pose88  | 17.42       |
| 4   | A chain | Pose127 | 17.3        |
| 5   | D Chain | Pose89  | 17.28       |
| 6   | A chain | Pose128 | 17.1        |
| 7   | C Chain | Pose95  | 17.08       |
| 8   | A chain | Pose129 | 16.88       |
| 9   | A chain | Pose130 | 16.54       |
| 10  | A chain | Pose131 | 16.12       |

**Table 2** The non-bonds between EWP and CS at the highest ZDOCK scores (A Chain Pose 126)

| Types                      | H-Donor       | H-Acceptor   | distance |
|----------------------------|---------------|--------------|----------|
| Conventional Hydrogen Bond | A:LYS296:HZ3  | CS:O611      | 3.006    |
| Conventional Hydrogen Bond | C:ALA28:HN    | CS:O471      | 2.872    |
| Conventional Hydrogen Bond | C:GLN87G:HE22 | CS:O612      | 2.092    |
| Conventional Hydrogen Bond | C:ASN91:HD21  | CS:O520      | 2.221    |
| Conventional Hydrogen Bond | C:HIS376:HD1  | CS:O516      | 2.610    |
| Conventional Hydrogen Bond | C:ASN380:HD21 | CS:O482      | 2.607    |
| Conventional Hydrogen Bond | CS:H462       | C:ASN380:OD1 | 2.683    |
| Conventional Hydrogen Bond | CS:H603       | A:GLU295:OE1 | 2.594    |
| Conventional Hydrogen Bond | CS:H604       | A:GLU295:OE2 | 2.554    |
| Carbon Hydrogen Bond       | A:SER215:HB2  | CS:O389      | 2.516    |
| Carbon Hydrogen Bond       | A:LYS296:HE1  | CS:O611      | 2.300    |
| Carbon Hydrogen Bond       | A:SER301:HA   | CS:O659      | 1.957    |
| Carbon Hydrogen Bond       | C:SER278:HB1  | CS:O336      | 1.542    |
| Carbon Hydrogen Bond       | C:THR379:HB   | CS:O481      | 2.779    |
| Carbon Hydrogen Bond       | CS:H404       | C:ASN279:OD1 | 2.702    |
| Carbon Hydrogen Bond       | CS:H452       | A:SER215:O   | 2.376    |
| Carbon Hydrogen Bond       | CS:H501       | C:ALA378:O   | 2.428    |
| Carbon Hydrogen Bond       | CS:H507       | C:ALA378:O   | 2.352    |
| Carbon Hydrogen Bond       | CS:H550       | C:ASP98:OD2  | 2.054    |
| Carbon Hydrogen Bond       | CS:H553       | C:ASP98:OD2  | 3.094    |
| Carbon Hydrogen Bond       | CS:H592       | A:LYS296:O   | 2.251    |
| Carbon Hydrogen Bond       | CS:H594       | A:LYS296:O   | 2.526    |
| Pi-Sulfur                  | CS:S468       | C:PHE269     | 5.293    |
| Pi-Sulfur                  | CS:S515       | C:HIS376     | 4.313    |

Example: A:LYS296:HZ3 means the HZ3 of the 296<sup>th</sup> Lysine (LYS296) from the A Chain of egg white protein (EWP). CS:O611 means the 611<sup>th</sup> O atom from chondroitin sulfate (CS).
